# Supplementary material
Source: publisher site journal article supplement (http://www.kjim.org/upload/media/kjim-2018-022-suppl1.pdf)
Supplement: Supplementary file 1 [file kjim-2018-022-suppl1.pdf]

**Supplementary Table 1. Demographics of the study enrollees**

| Variable                                         | FLI < 60 (n = 19,048,725) | FLI ≥ 60 (n = 2,543,649) | p value |
|--------------------------------------------------|---------------------------|--------------------------|---------|
| Male sex                                         | 8,489,867 (44.57)         | 1,999,161 (78.59)        | < 0.001 |
| Age, yr                                          | 47.6 ± 14.5               | 48.5 ± 12.9              | < 0.001 |
| < 40                                             | 5,612,971 (29.47)         | 667,250 (26.23)          | < 0.001 |
| 40–60                                            | 10,733,947 (56.35)        | 1,555,383 (61.15)        | < 0.001 |
| ≥ 60                                             | 2,701,807 (14.18)         | 321,016 (12.62)          | < 0.001 |
| Current smoker                                   | 3,903,300 (20.49)         | 1,001,952 (39.39)        | < 0.001 |
| Alcohol consumption <sup>a</sup>                 | 7,862,705 (41.28)         | 1,537,409 (60.44)        | < 0.001 |
| Regular exercise <sup>b</sup>                    | 3,379,448 (17.74)         | 426,799 (16.78)          | < 0.001 |
| Lower quintile of yearly income                  | 4,063,197 (21.33)         | 491,132 (19.31)          | < 0.001 |
| BMI, kg/m <sup>2</sup>                           | 23.1 ± 2.8                | 28.1 ± 3.1               | < 0.001 |
| BMI, ≥ 25 kg/m <sup>2</sup>                      | 4,630,416 (24.31)         | 2,184,201 (85.87)        | < 0.001 |
| WC, cm                                           | 78.1 ± 8.1                | 92.4 ± 6.9               | < 0.001 |
| WC ≥ 90 cm                                       | 4,274,102 (22.44)         | 1,821,347 (71.6)         | < 0.001 |
| SBP, mmHg                                        | 120.9 ± 14.9              | 130 ± 14.6               | < 0.001 |
| DBP, mmHg                                        | 75.1 ± 9.8                | 81.4 ± 9.9               | < 0.001 |
| Serum glucose, mg/dL                             | 95.7 ± 21                 | 108.2 ± 32.3             | < 0.001 |
| Serum cholesterol, mg/dL                         | 192.6 ± 35.9              | 211.3 ± 39.5             | < 0.001 |
| Serum triglyceride, mg/dL <sup>c</sup>           | 100.18 (100.16–100.21)    | 226.41 (226.27–226.55)   | < 0.001 |
| ALT, IU/L <sup>c</sup>                           | 20.01 (20.01–20.02)       | 37.71 (37.69–37.74)      | < 0.001 |
| AST, IU/L <sup>c</sup>                           | 23.08 (23.07–23.08)       | 31.39 (31.37–31.4)       | < 0.001 |
| GGT, IU/L <sup>c</sup>                           | 22.69 (22.68–22.7)        | 64.45 (64.39–64.5)       | < 0.001 |
| Hypertension                                     | 4,394,122 (23.07)         | 1,169,468 (45.98)        | < 0.001 |
| Dyslipidaemia <sup>d</sup>                       | 3,248,048 (17.05)         | 920,307 (36.18)          | < 0.001 |
| Diabetes                                         | 1,439,820 (7.56)          | 505,886 (19.89)          | < 0.001 |
| ≥ 1 of metabolic syndrome component <sup>e</sup> | 6,586,701 (34.58)         | 1,666,824 (65.53)        | < 0.001 |
| Developing CRC                                   | 121,483 (0.64)            | 19,785 (0.78)            | < 0.001 |
| Follow-up duration, yr                           | 5.3 ± 1.1                 | 5.3 ± 1.2                | < 0.001 |

Values are presented as number (%) or mean ± SD.

FLI, fatty liver index; BMI, body mass index; WC, waist circumference; SBP, systolic blood pressure; DBP, diastolic blood pressure; ALT, alanine transaminase; AST, aspartate aminotransferase; GGT, gamma glutamyltransferase; CRC, colorectal cancer.

<sup>a</sup>Persons who alcohol consumption ≥ 30 g/day were initially excluded.

<sup>b</sup>Persons who did not perform high intensity of activity ≥ 3/week or moderate intensity of activity ≥ 5/week.

<sup>c</sup>Geometric mean (95% confidence interval).

<sup>d</sup>Triglyceride ≥ 150 mg/dL or user of lipid lowering drug.

<sup>e</sup>Having more than 1 of component among hypertension, dyslipidaemia and diabetes mellitus.
